# Supplementary material for: The Triple Challenge: Food Security and Vulnerabilities of Fishing and Farming Households in Situations Characterized by Increasing Conflict, Climate Shock, and Environmental Degradation
Source: MDPI journal article supplement (doi:10.3390/land11111982), 2022-11-05
Supplement: s1 [file s1]

Archive with 1 entries (1 files):
- land-1949076-supplementary.pdf
